# Supplementary material for: Faulty autolysosome acidification in Alzheimer’s disease mouse models induces autophagic build-up of Aβ in neurons, yielding senile plaques
Source: PubMed Central journal article supplement (PMC9174056; doi:10.1038/s41593-022-01084-8), 2022-06-02

Figure 7e

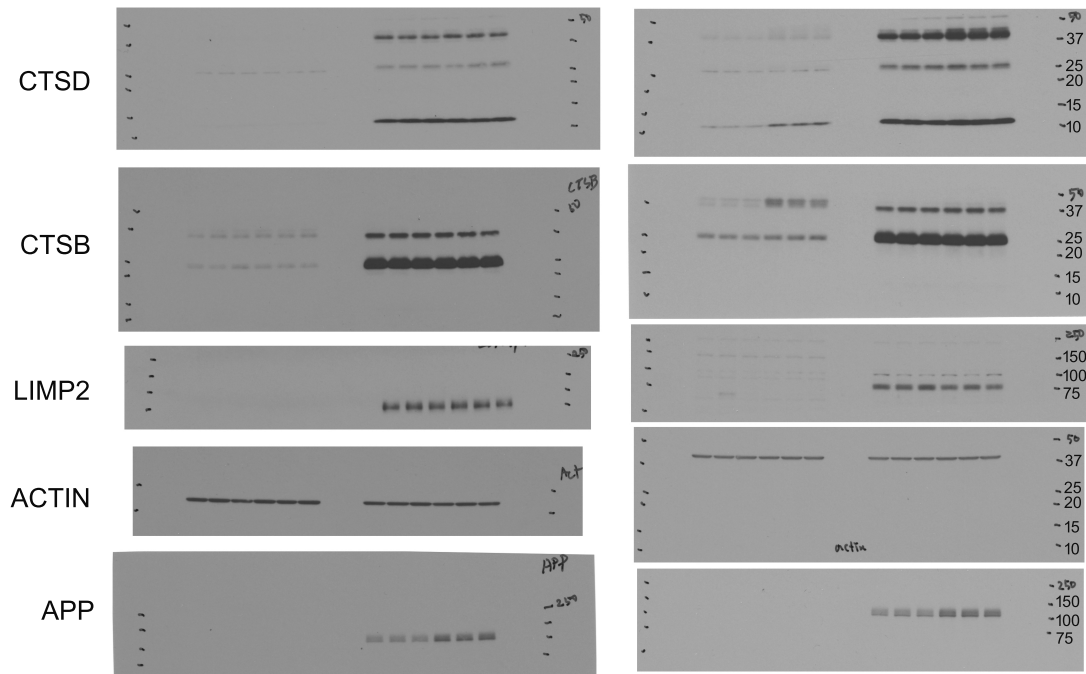

Supplement: 41593_2022_1084_MOESM8_ESM.pdf [file 41593_2022_1084_MOESM8_ESM.pdf]
